# Supplementary material
Source: publisher figshare collection journal article supplement (https://acs.figshare.com/ndownloader/files/4569127)
Supplement: Supplementary file 1 [file 4569127]

Supporting information.

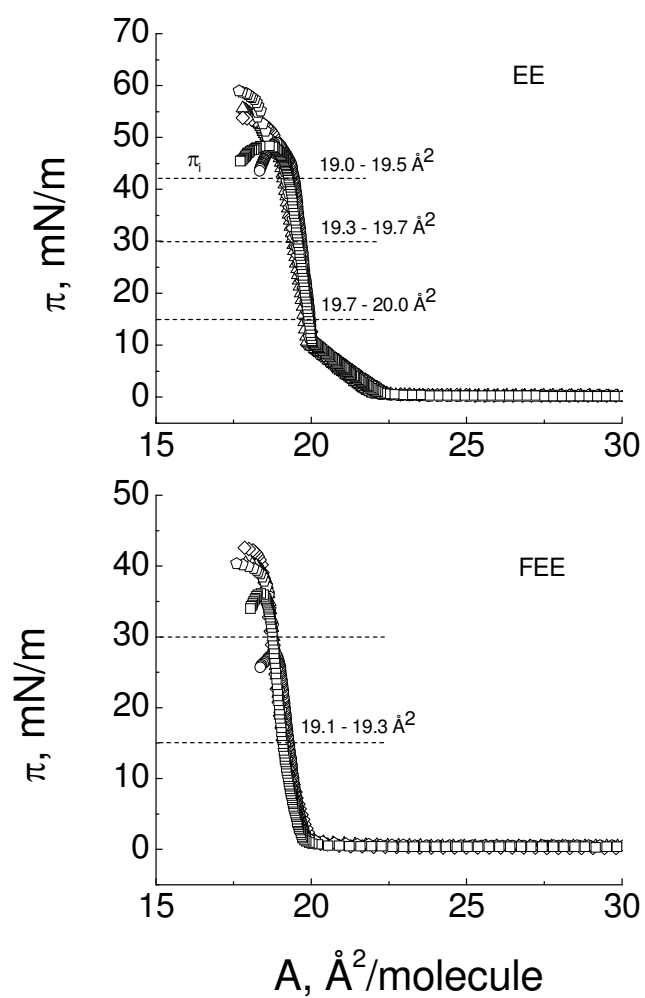

**Figure 1-S.** Surface pressure-molecular area isotherms of the individual EE and FEE monolayers recorded at compression velocities between 3 and 36  $\text{cm}^2/\text{min}$ , respectively 1 and 10  $\text{\AA}^2/\text{molecule.min}$ .
